# Supplementary material for: Differential Expression of HERV-K (HML-2) Proviruses in Cells and Virions of the Teratocarcinoma Cell Line Tera-1
Source: MDPI journal article supplement (doi:10.3390/v7030939), 2015-03-04
Supplement: s1 [file s1]

Supplementary Figure 1

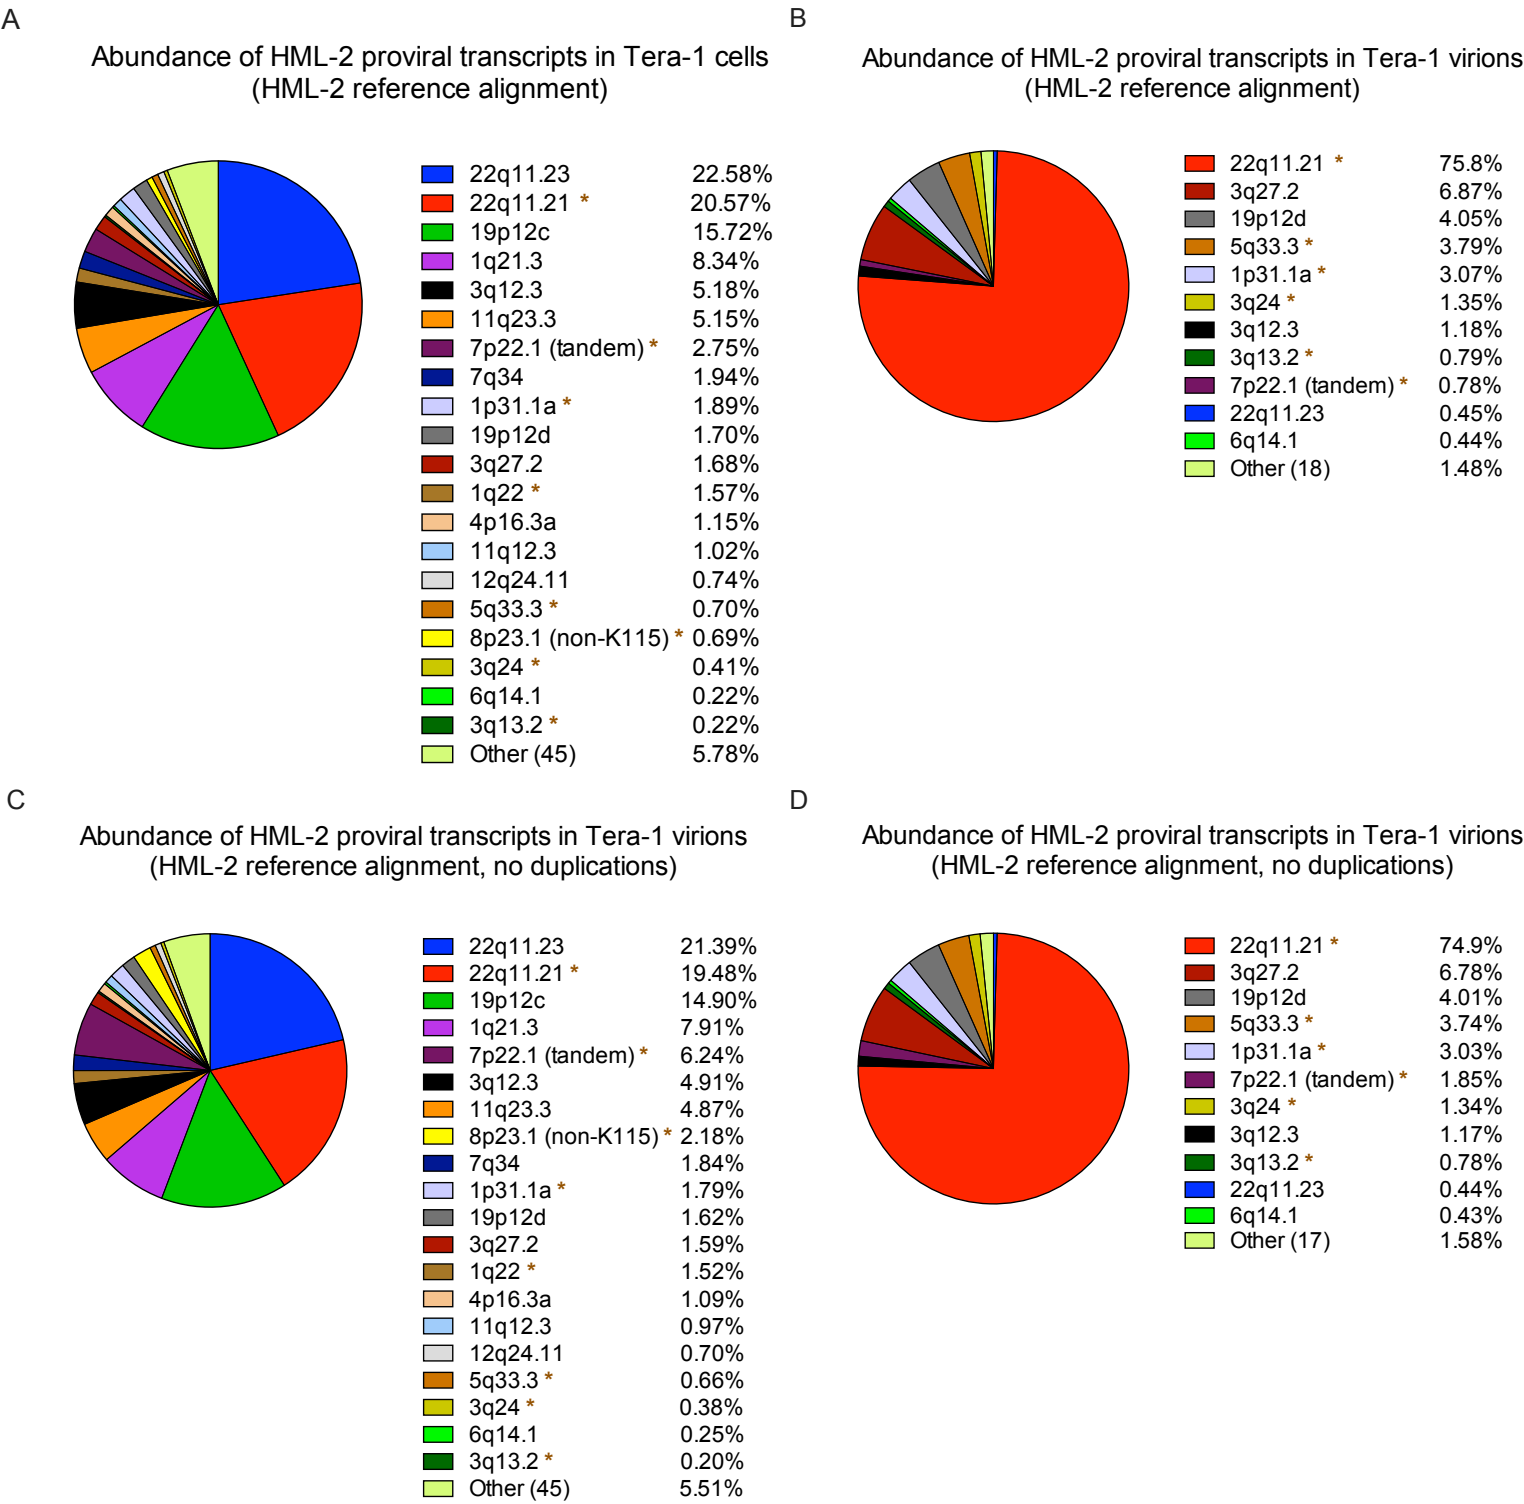

Supplementary Figure 2

- \* Underrepresented in simulation
- Minus strand transcription
- ◆ Plus strand transcription from neighboring element

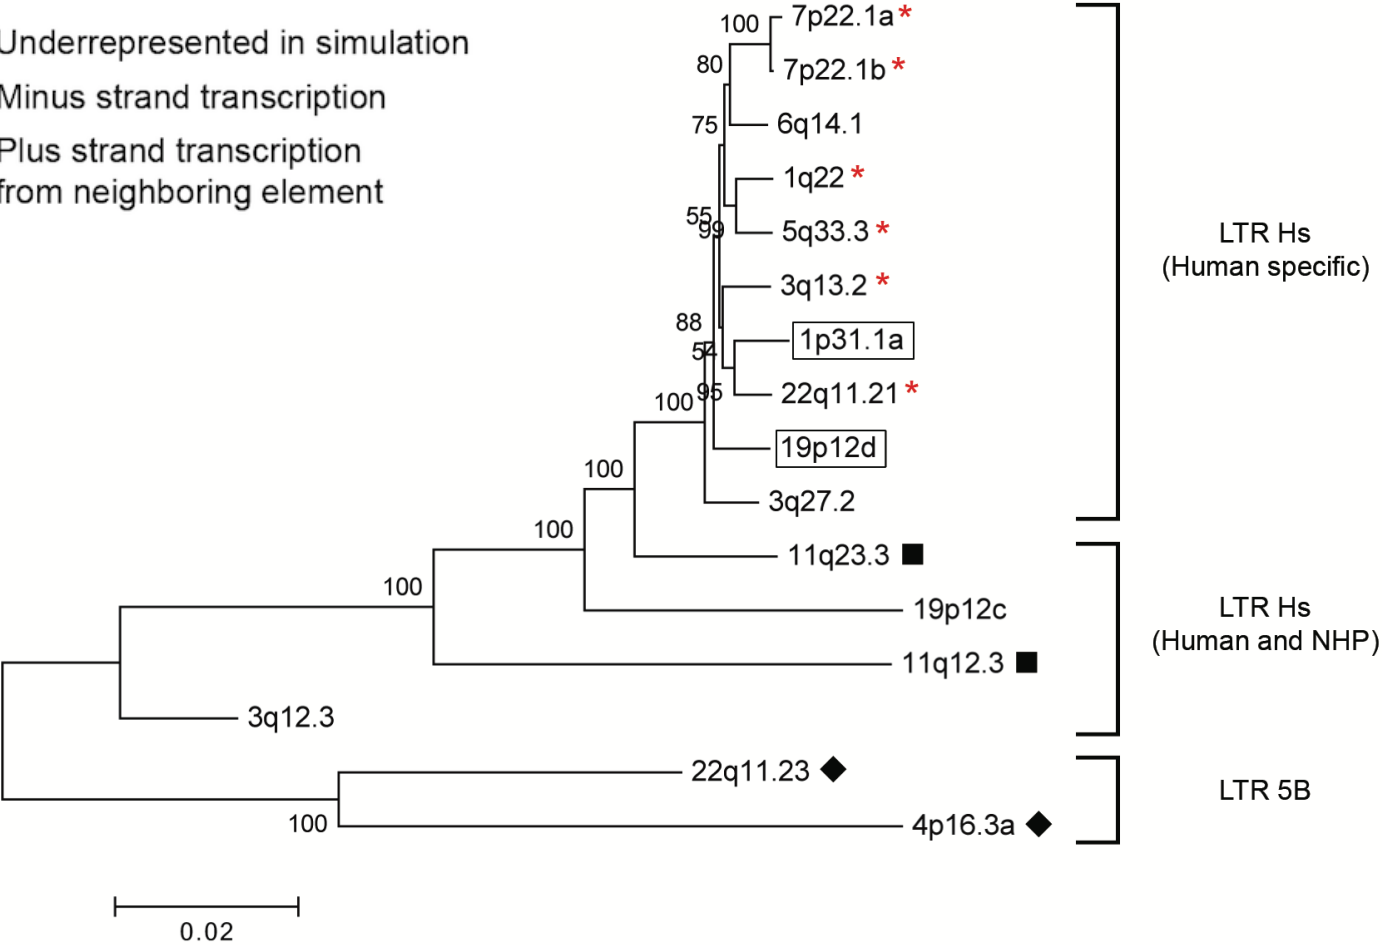

# Supplementary Figure 3

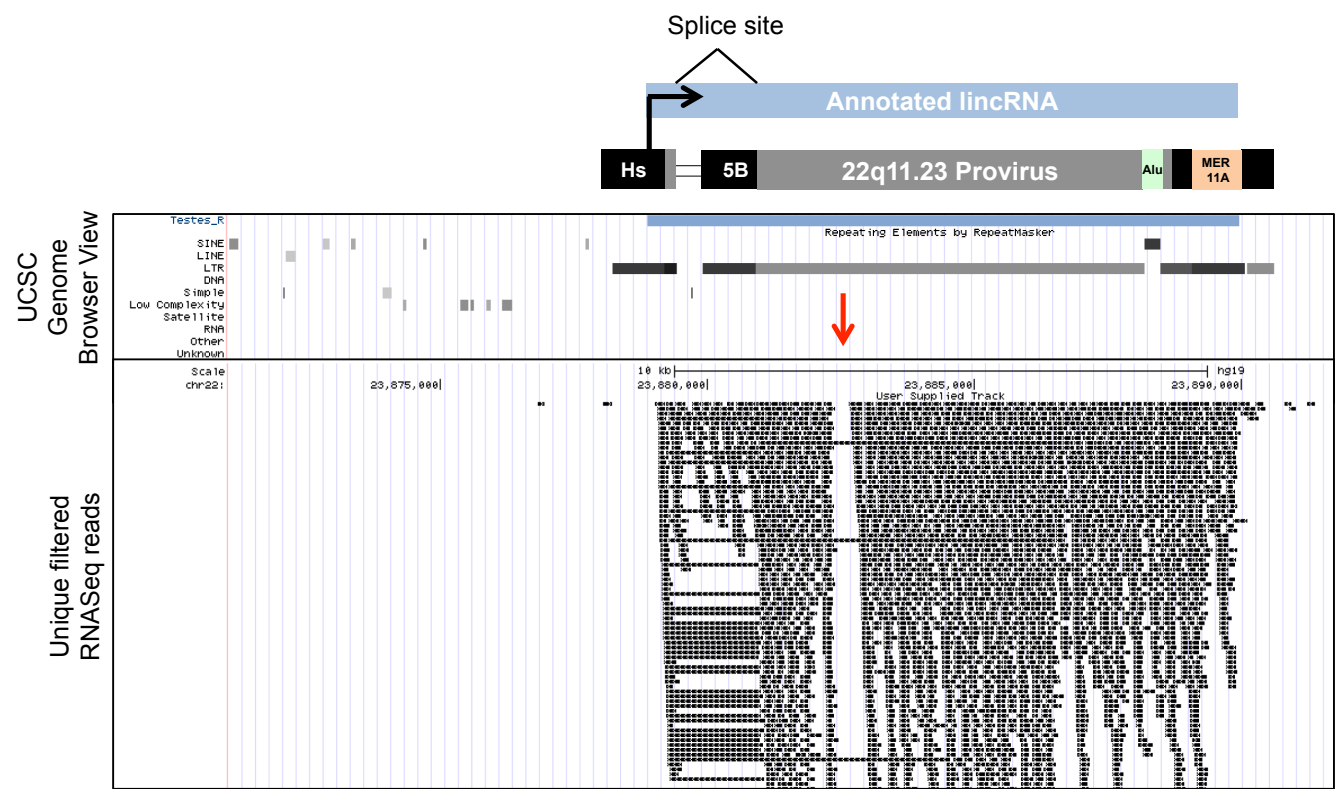

## KEY:

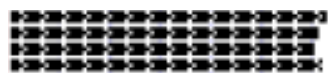

Reads crossing splice junctions  
(Note: appear as one line of uniform boxes spanning 100s-1000s nt)

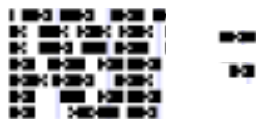

Reads that do not cross splice junctions  
(Note: appear as a grouping of 1-3 boxes and span 100-301 nt)

# Supplementary Figure 4

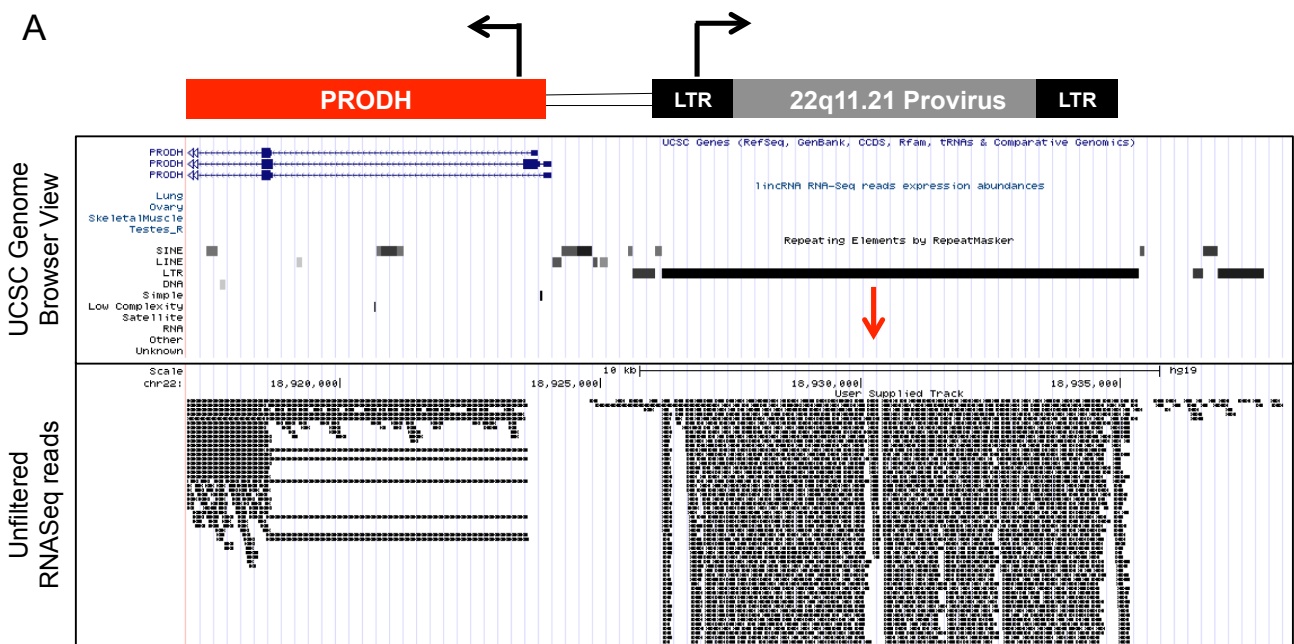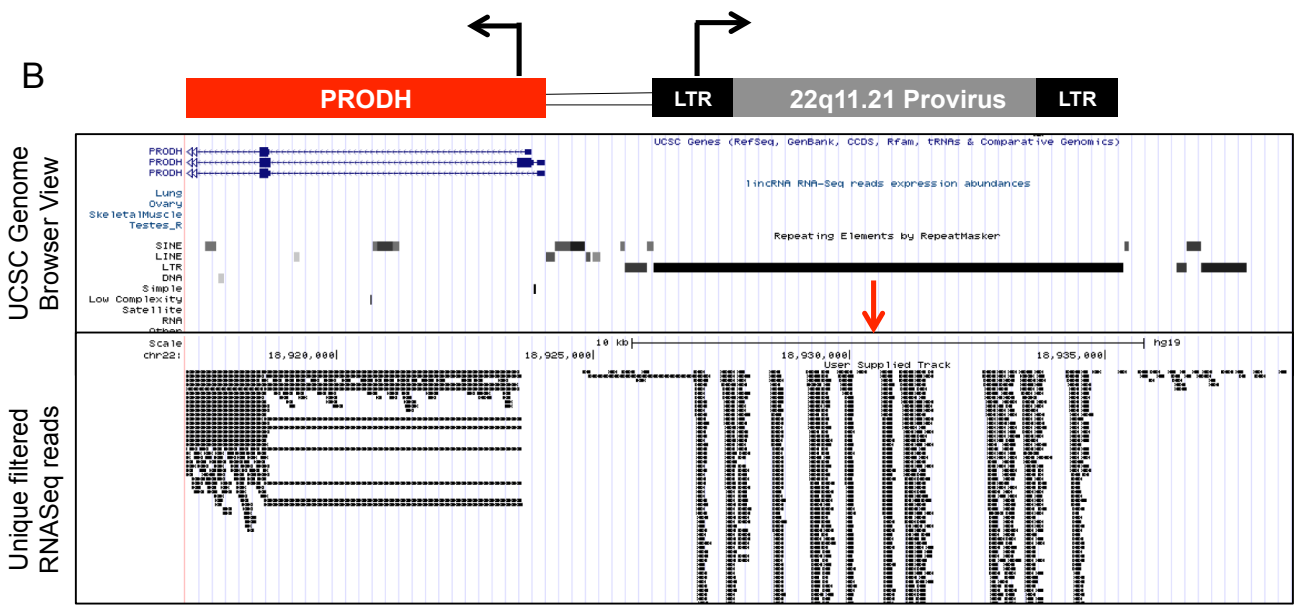

## KEY:

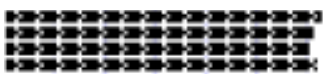

Reads crossing splice junctions  
(Note: appear as one line of uniform boxes spanning 100s-1000s nt)

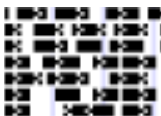

Reads that do not cross splice junctions  
(Note: appear as a grouping of 1-3 boxes and span 100-301 nt)

Supplementary Figure 5

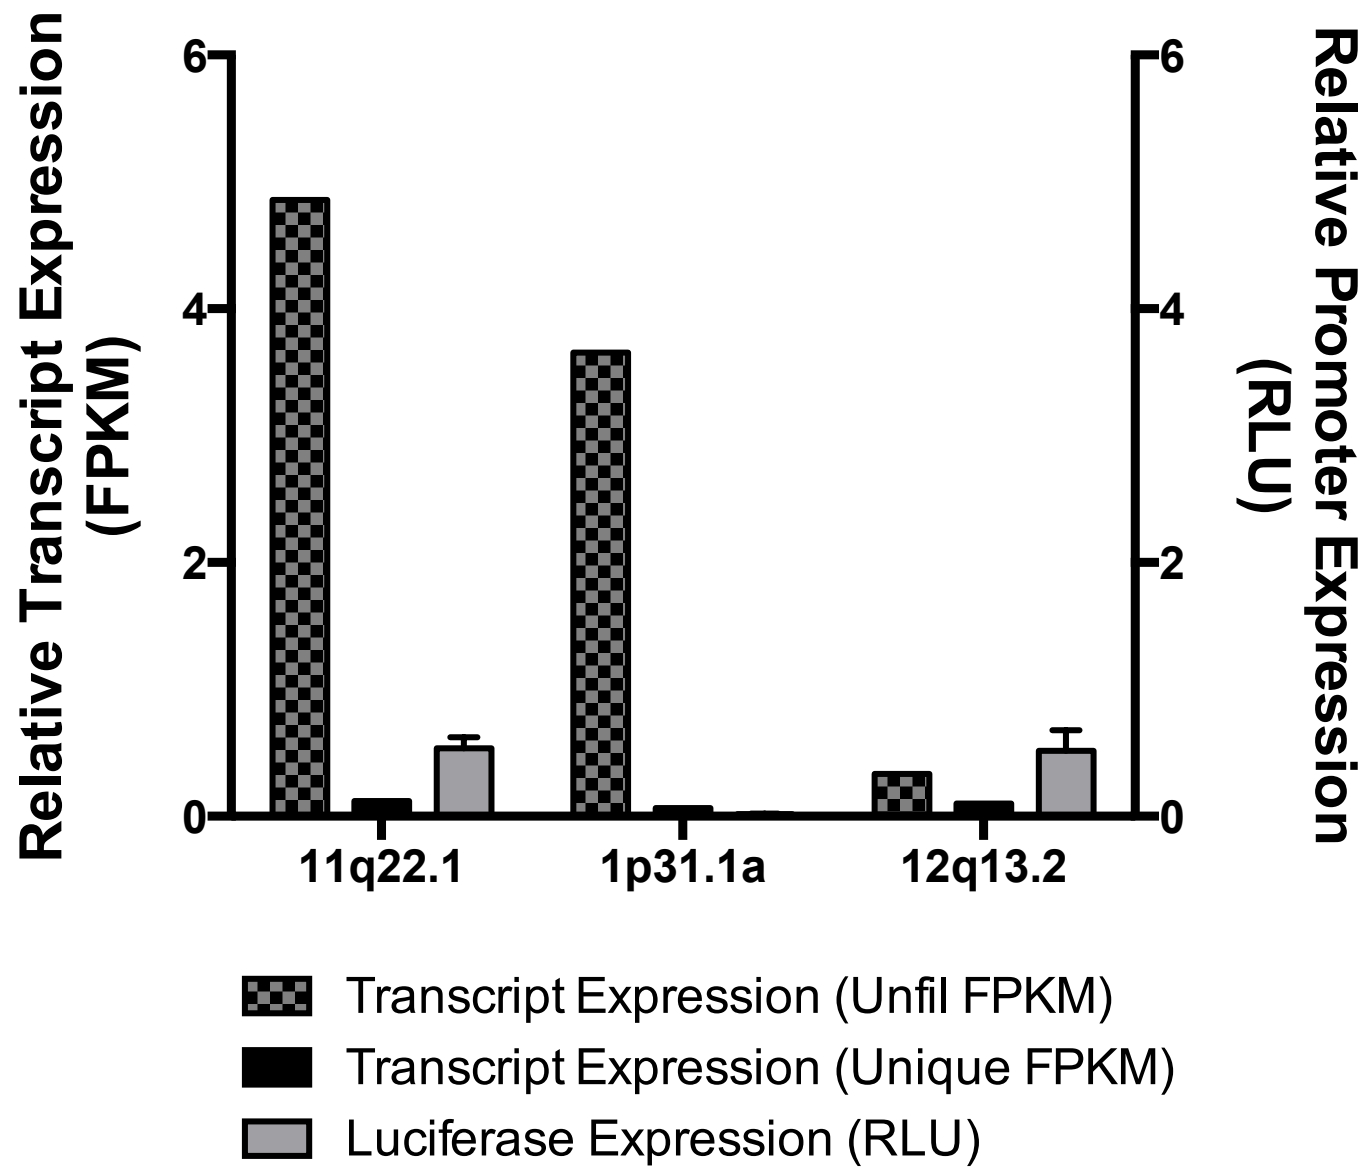

Supplementary Figure 6

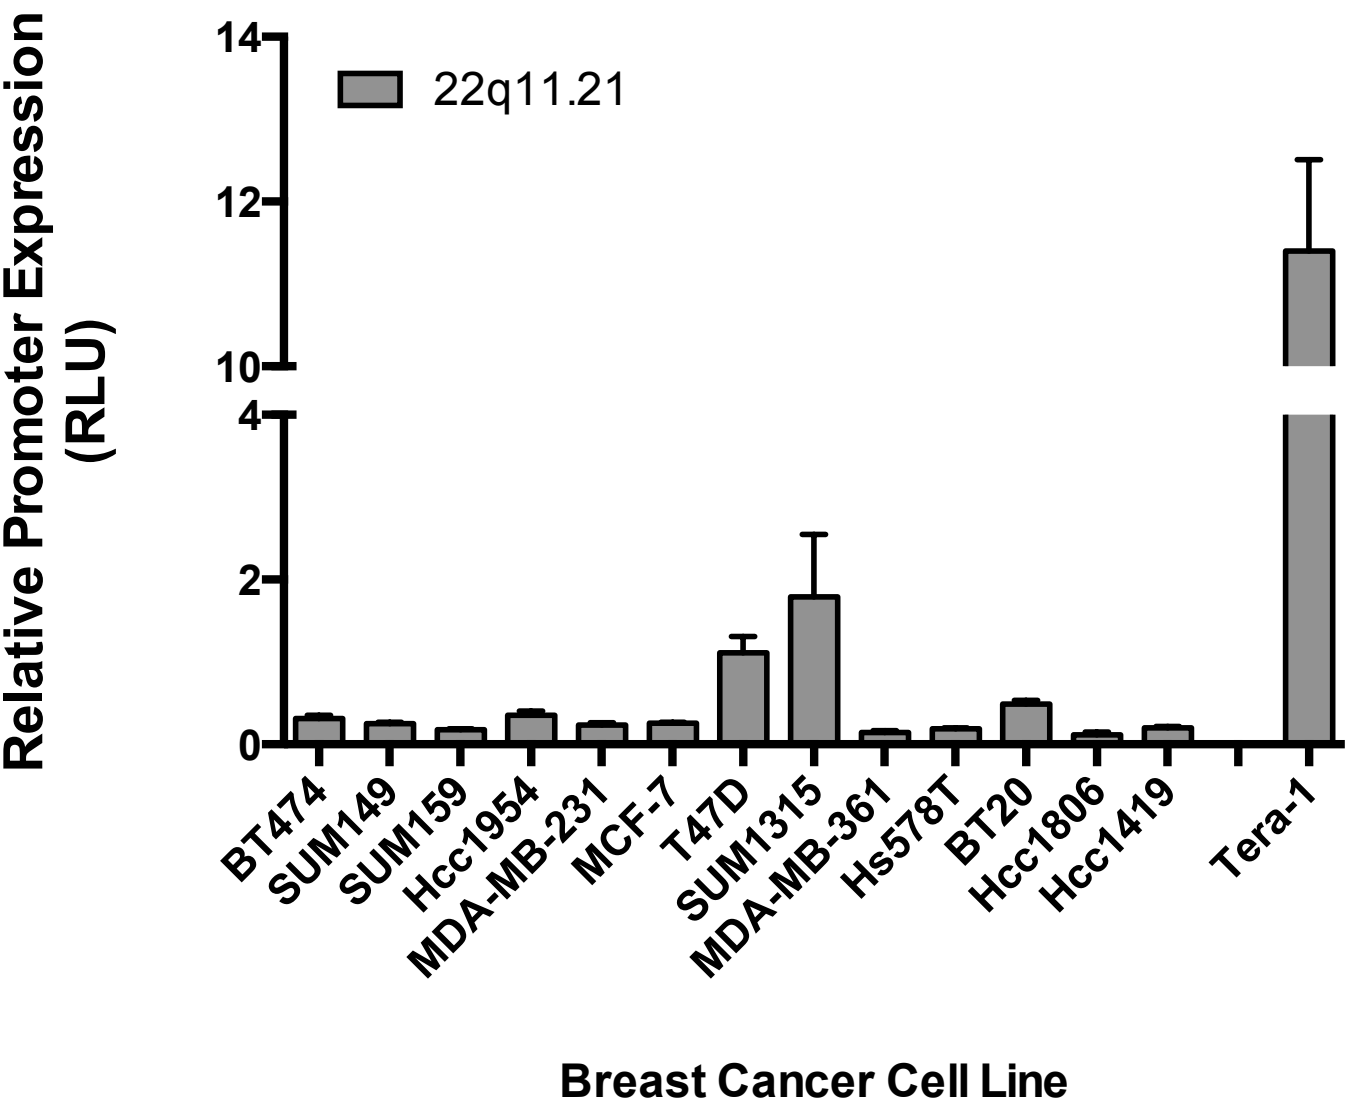

Supplementary Figure 7

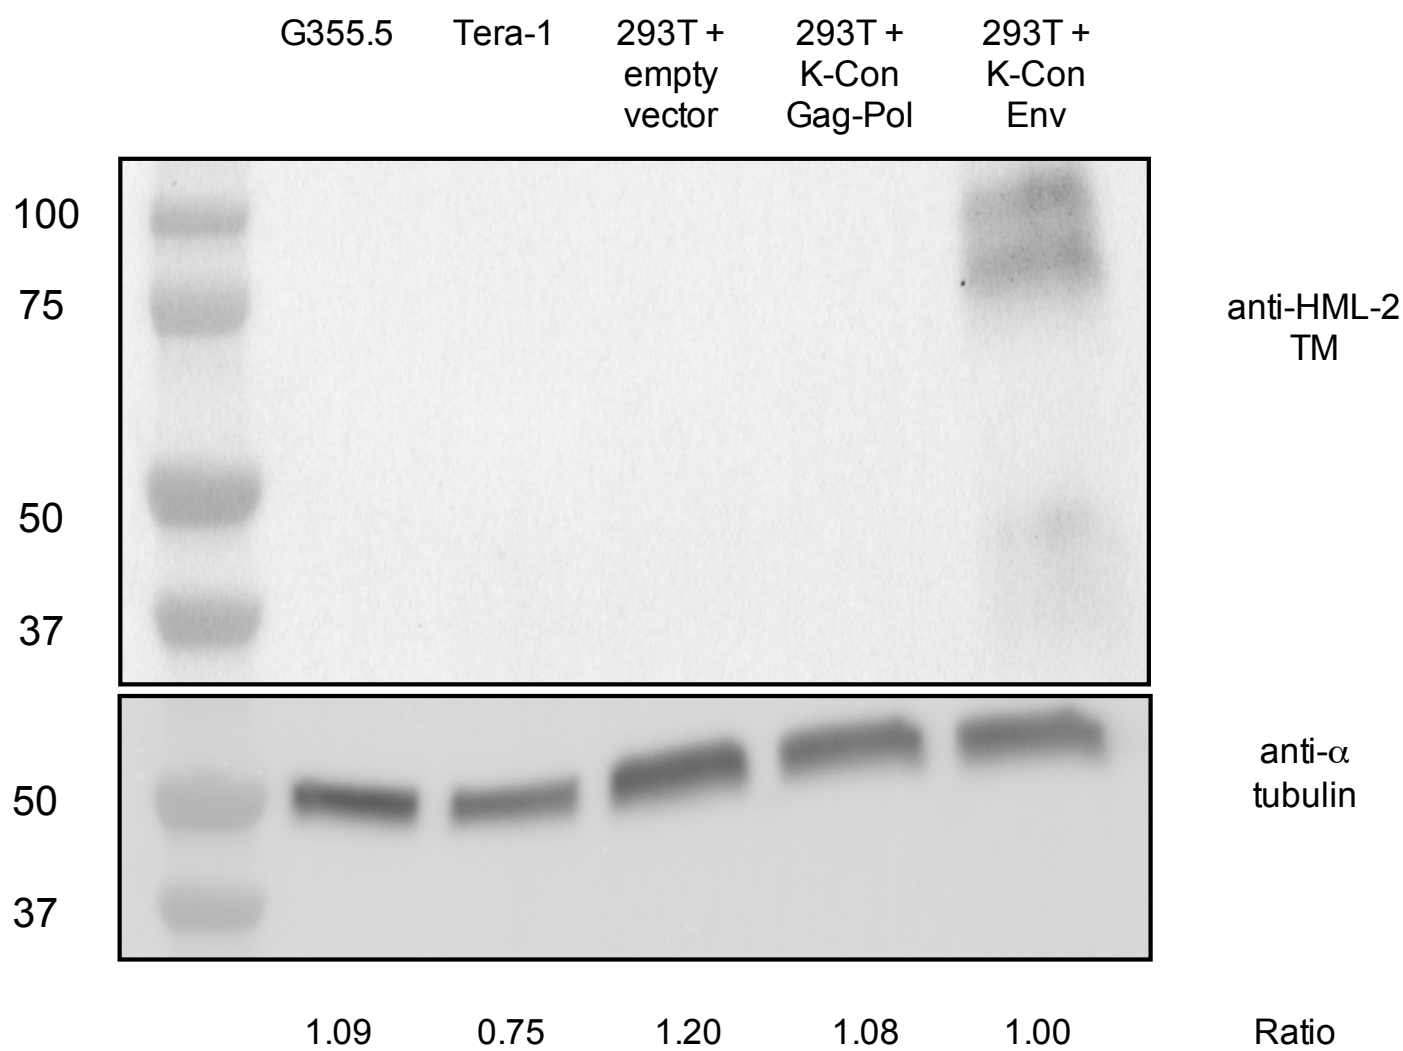

**Table S1. Primers used to amplify 5' LTRs of HML-2 proviruses.**

| Provirus           | Chromosomal Location (hg19)  | Primer Sequences                                                                       |
|--------------------|------------------------------|----------------------------------------------------------------------------------------|
| 22q11.21           | chr22:18,926,187-18,927,154  | F: 5'-ATTATAGGTACCTGCCTCAACCTCCCAAGTAG-3'<br>R: 5'-ATTATAGAGCTCCGGCTCTGCTACATATTCGC-3' |
| 3q12.3             | chr3:101,410,737-101,411,705 | F: 5'-ATTATAGGTACCAAGGAGGCTGAGCAGATGAG-3'<br>R: 5'-ATTATTAAGCTTTTCCAGGGGCATCAGAAACT-3' |
| 1q22               | chr1:155,604,669-155,605,636 | F: 5'-ATTATAGAGCTCCGTTGACTGAGCCATTACCG-3'<br>R: 5'-ATTATAGGTACCTAAAATCCAGCAGCCCAGGA-3' |
| 7p22.1a            | chr7:4,630,561-4,631,528     | F: 5'-ATTATAGAGCTCCGTTGACTGAGCCATTACCG-3'<br>R: 5'-ATTATAGGTACCAGTCTGAGCATCACTGGGAC-3' |
| 3q13.2             | chr3:112,751,323-112,752,282 | F: 5'-ATTATAGAGCTCGGGATCTCTCGTCGACTTGT-3'<br>R: 5'-ATTATAGGTACCTCCTGCCTGAGAGTTTCCAG-3' |
| 7p22.1b            | chr7:4,639,064-4,640,031     | F: 5'-ATTATAGAGCTCCGTTGACTGAGCCATTACCG-3'<br>R: 5'-ATTATAGGTACCAATACCCACAGCACCCAAGA-3' |
| 1p31.1a            | chr1:75,842,771-75,843,738   | F: 5'-ATTATAGGTACCGCCTCAGGAGTCGATGCTAT-3'<br>R: 5'-ATTATAGAGCTCTTCCAGGGGCATCAGAAACT-3' |
| 22q11.23           | chr22:23,879,927-23,880,916  | F: 5'-ATTATAGGTACCGGAGAGAGCAGGGGTTTTCT-3'<br>R: 5'-ATTATAGAGCTCATGGCCCCAATGATTCTGGA-3' |
| 22q11.23<br>LTR Hs | chr22:23,878,249-23,879,213  | F: 5'-ATTATAGGTACCTGTTGTAAGGGGAGCTGGAG-3'<br>R: 5'-ATTATAGAGCTCTCGAGAGTCCCTTCACCCTA-3' |



**Table S2. Primers used to create and amplify truncated versions of 22q11.23 LTR Hs.**

| <b>LTR Truncation Sites</b> | <b>Chromosomal Location (hg19)</b> | <b>Primer Sequences</b>                                                                |
|-----------------------------|------------------------------------|----------------------------------------------------------------------------------------|
| 1→435                       | chr22:23,878,249-23,878,683        | F: 5'-ATTATAGGTACCGCCACTGCCATCTACTAGGA-3'<br>R: 5'-ATTATAGAGCTCTCAGCACAGACCCTTTACGG-3' |
| 1→522                       | chr22:23,878,249-23,878,770        | F: 5'-ATTATAGGTACCGCCACTGCCATCTACTAGGA-3'<br>R: 5'-ATTATAGAGCTCCATTCCATTGCCCAGGGATG-3' |
| 1→740                       | chr22:23,878,249-23,878,988        | F: 5'-ATTATAGGTACCGCCACTGCCATCTACTAGGA-3'<br>R: 5'-ATTATAGAGCTCGTAATAGTGGGGAGAGGGCC-3' |
| 1→805                       | chr22:23,878,249-23,879,053        | F: 5'-ATTATAGGTACCTGGGATGAACTAGAGGACGC-3'<br>R: 5'-ATTATAGAGCTCTCCCTCAGTATTTATTGATC-3' |
| 1→815                       | chr22:23,878,249-23,879,063        | F: 5'-ATTATAGGTACCAGTGCACAGTTCAAAACCCC-3'<br>R: 5'-ATTATAGAGCTCGTCTCTGAGTTCCTCAGTA-3'  |
| 1→826                       | chr22:23,878,249-23,879,074        | F: 5'-ATTATAGGTACCGGATGAACTAGAGGACGCCC-3'<br>R: 5'-ATTATAGAGCTCGCGCCGCACCGGTCTCTGAG-3' |
| 1→847                       | chr22:23,878,249-23,879,095        | F: 5'-ATTATAGGTACCTGGGATGAACTAGAGGACGC-3'<br>R: 5'-ATTATAGAGCTCCGCTCAGCATATGGAGGACC-3' |
| Full LTR (1→965)            | chr22:23,878,249-23,879,213        | F: 5'-ATTATAGGTACCTGTTGTAAGGGGAGCTGGAG-3'<br>R: 5'-ATTATAGAGCTCTCGAGAGTCCCTTCACCCTA-3' |

**Table S3. HML-2 proviruses not present in the hg19 build of the human genome.**

| <b>Provirus</b> | <b>Chromosomal Location (hg19)</b> | <b>Solo LTR or Empty Site (hg19)</b> |
|-----------------|------------------------------------|--------------------------------------|
| K105            | chrUn_gl000219: 175210-176178      | Solo LTR                             |
| 1p31.1b         | chr1: 73594980-73595948            | Solo LTR                             |
| 10p12.1         | chr10: 27182399-27183380           | Solo LTR                             |
| 12q13.2         | chr12: 55727215-55728183           | Solo LTR                             |
| 19p12b          | chr19:21841536-21841542            | Empty site                           |
| 19p12d          | chr19:22414379-22414382            | Empty site                           |

**Table S4. Presence of spliced accessory transcripts in HML-2 provirus alignments**

| <b>Provirus</b> | <b>HML-2 Type</b> | <b>Transcripts present in<br/>Unfiltered alignment</b> | <b>Transcripts present in<br/>Unique Only alignment</b> |
|-----------------|-------------------|--------------------------------------------------------|---------------------------------------------------------|
| <b>22q11.23</b> | 2                 | rec                                                    | rec                                                     |
| <b>22q11.21</b> | 1                 | np9, hel                                               | np9, hel                                                |
| <b>19p12c</b>   | 1                 | hel                                                    | hel                                                     |
| <b>3q12.3</b>   | 1                 | np9, hel                                               | np9, hel                                                |
| <b>1q22</b>     | 1                 | np9, hel                                               | none                                                    |
| <b>7p22.1</b>   | 2                 | rec                                                    | rec                                                     |
| <b>6q14.1</b>   | 1                 | rec, hel                                               | rec                                                     |
| <b>5q33.3</b>   | 1                 | np9, hel                                               | hel                                                     |

The alignment of Tera-1 cell reads to the HML-2 genome was visualized using IGV. All proviruses noted in Figure 2B were examined for the presence of spliced reads. Those proviruses with spliced reads correlating to known accessory transcripts are listed in Table S4. Note that some transcripts are not present in both Unfiltered and Unique Only alignments.
